# Supplementary material for: Specialist and Generalist Fungal Parasites Induce Distinct Biochemical Changes in the Mandible Muscles of Their Host
Source: MDPI journal article supplement (doi:10.3390/ijms20184589), 2019-09-17
Supplement: s1 [file s1]

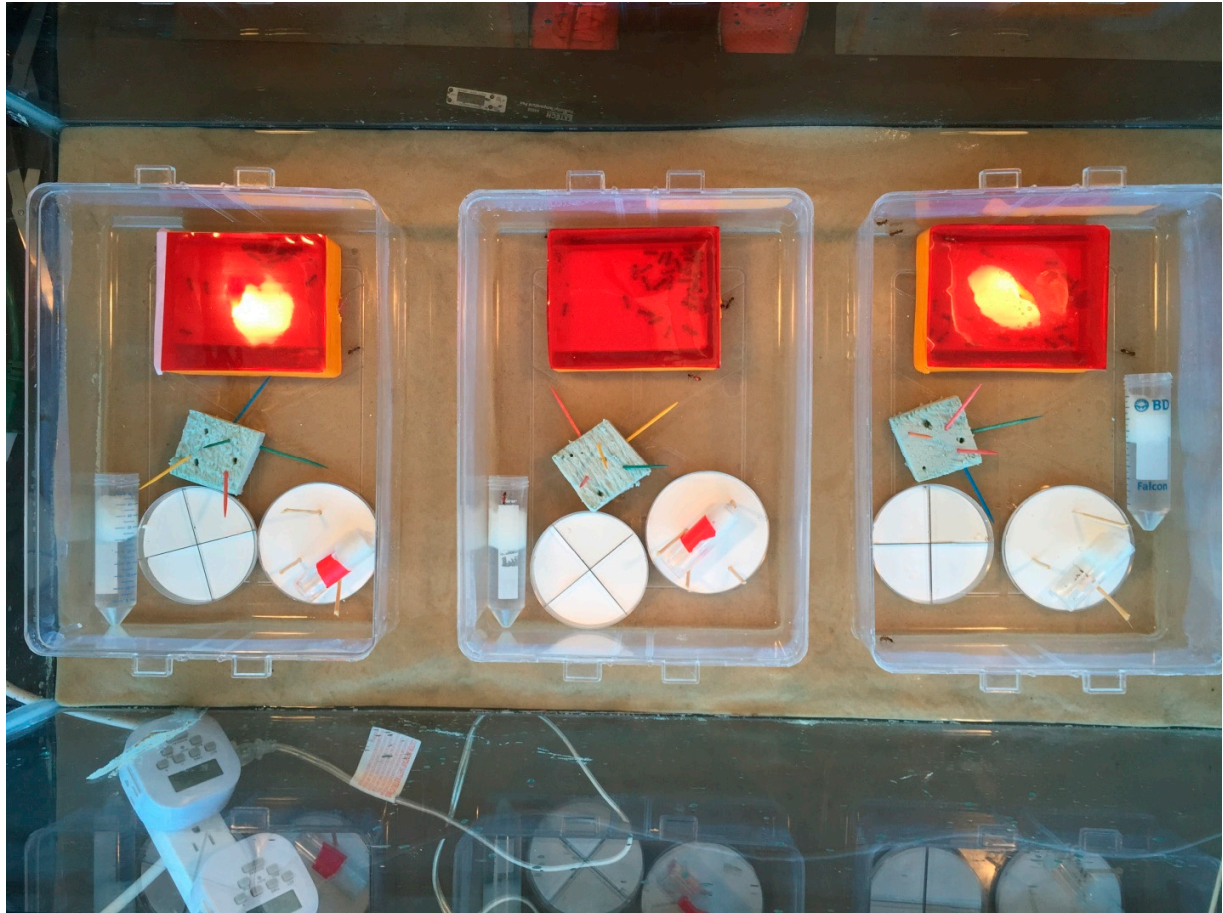

Figure S1: Ants infected with *O. unilateralis*

Table S1: Colony information of samples used for the metabolites study

|        |      |       |       |       |       |      |      |       |       |       |
|--------|------|-------|-------|-------|-------|------|------|-------|-------|-------|
| Colony | KFM1 | KFM1  | KFM22 | KFM22 | KFMX  | KFM1 | KFM1 | KFM22 | KFMX  | KFMX  |
| Sample | MCO1 | MCO2  | MCO3  | MCO4  | MCO5  | MCO6 | MCO7 | MCO8  | MCO9  | MCO10 |
| Colony | KFM1 | KFM22 | KFMX  | KFMX  | KFMX  | KFM1 | KFM1 | KFM1  | KFMX  | KFM22 |
| Sample | MBE1 | MBE2  | MBE3  | MBE4  | MBE5  | MBE6 | MBE7 | MBE8  | MBE9  | MBE10 |
| Colony | KFM1 | KFM1  | KFMX  | KFM1  | KFM22 | KFM1 | KFM1 | KFM22 | KFM22 | KFMX  |
| Sample | MOR1 | MOR2  | MOR3  | MOR4  | MOR5  | MOR6 | MOR7 | MOR8  | MOR9  | MOR10 |
